# Supplementary material for: Interface-enhanced CO2 capture via the synthetic effects of a nanomaterial-supported ionic liquid thin film
Source: Royal Society of Chemistry journal article supplement (doi:10.1039/d0na00875c), 2020-12-28
Supplement: d0na00875c1.pdf [file d0na00875c1.pdf]

## Supporting Information

# Interface Enhanced CO<sub>2</sub> Capture through Synthetic Effects of Nanomaterial Supported Ionic Liquid Thin Film

Yang Liu,<sup>a</sup> Yanmei Yang,<sup>\*b</sup> Yuanyuan Qu,<sup>a</sup> Yong-Qiang Li,<sup>a</sup> Mingwen Zhao<sup>a</sup> and  
Weifeng Li<sup>\*a</sup>

<sup>a</sup>*School of Physics and State Key Laboratory of Crystal Materials, Shandong University, Jinan, Shandong, 250100, China*

<sup>b</sup>*College of Chemistry, Chemical Engineering and Materials Science, Collaborative Innovation Center of Functionalized Probes for Chemical Imaging in Universities of Shandong, Key Laboratory of Molecular and Nano Probes, Ministry of Education, Institute of Molecular and Nano Science, Shandong Normal University, Jinan, 250014, China*

\* Corresponding authors. yym@sdu.edu.cn (Y. Yang) and lwf@sdu.edu.cn (W. Li.)

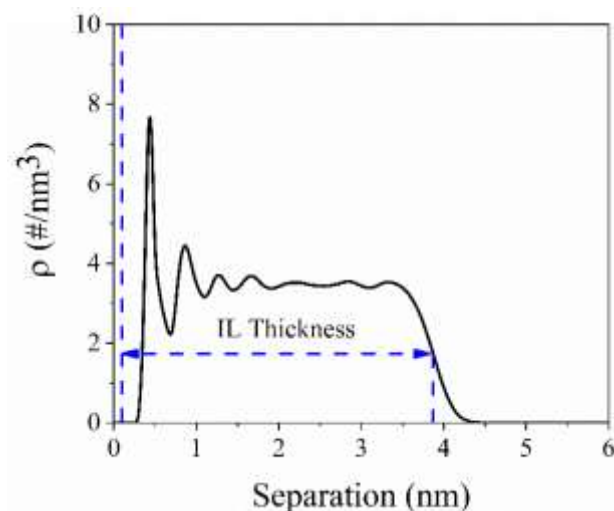

**Figure S1** Definition of the IL film thickness. The thickness is defined as the distance from the nanosheet to the liquid-gas interface, where the IL density is half of the bulk value.

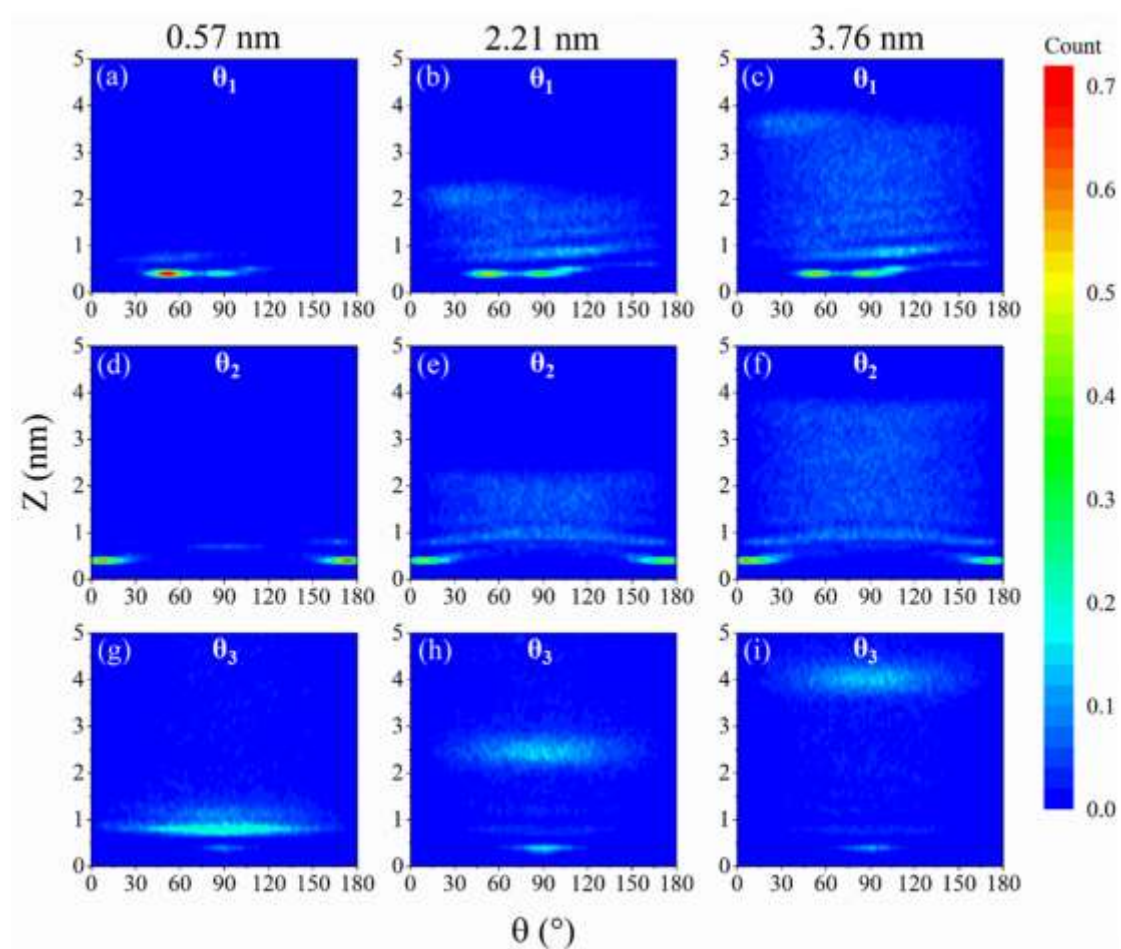

**Figure S2** Distribution of the tilt angles of the ethyl side chain of cations (a-c), imidazolium ring of cations (d-g) and CO<sub>2</sub> (g-i) in three IL films attached to C<sub>3</sub>N with IL thickness of 0.57 nm, 2.21 nm and 3.76 nm, respectively.

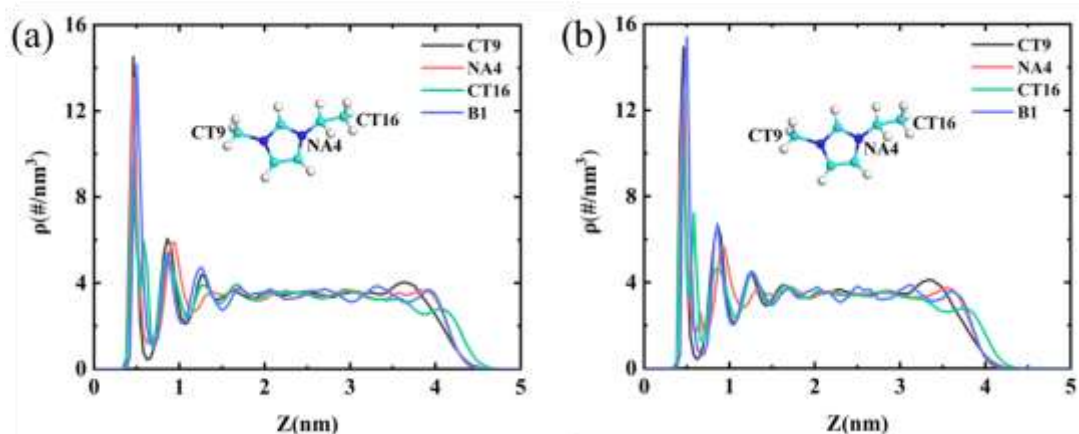

**Figure S3** Number density profiles of atomic groups of cations and anions in the (a) GRA systems and (b) C<sub>3</sub>N systems. The profiles are generated based on the last 30 ns trajectories of the system containing 140 ion pairs. The methyl group, imidazolium ring and ethyl group of the cation are represented by CT9, NA4 and CT16 atoms, respectively, as illustrated by the embedded molecular structure. The anion is represented by the boron atom.

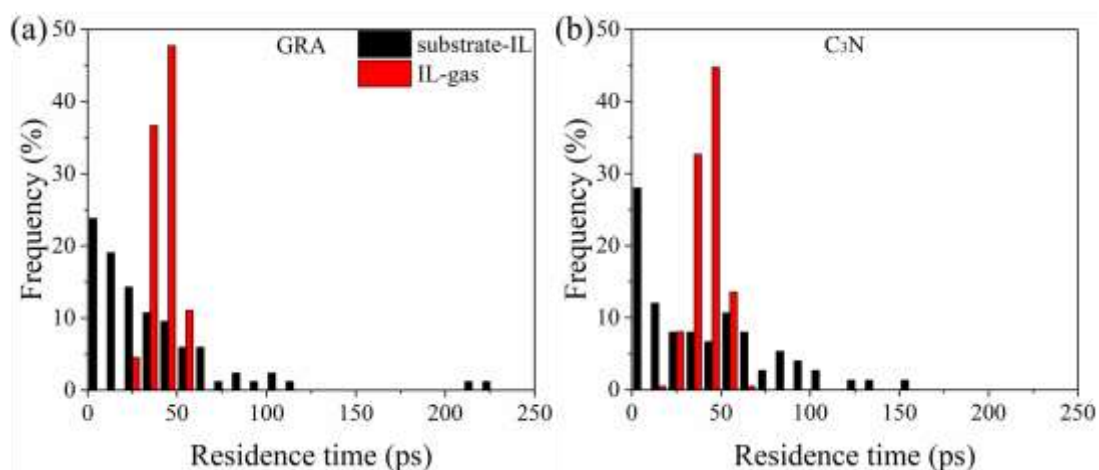

**Figure S4** Distribution of the residence time of CO<sub>2</sub> molecules in the two interfacial regions of the GRA system (a) and C<sub>3</sub>N system (b). The residence time is calculated based on the simulation systems with IL thickness of 4.09 nm (GRA) and 3.76 nm (C<sub>3</sub>N). The substrate-IL interfaces are defined as the region with z-coordinates from 0.34 nm to 1.02 nm in both the GRA system and the C<sub>3</sub>N system. The IL-gas interfaces are defined as the region with z-coordinates from 3.66 nm to 5.58 nm in the GRA system and z-coordinates from 3.06 nm to 4.98 nm in the C<sub>3</sub>N system.

**Table S1** Percentage of the captured and uncaptured CO<sub>2</sub> in the GRA systems.

| Thickness<br>(nm) | Captured CO <sub>2</sub> (%) |             |                         | Uncaptured<br>CO <sub>2</sub> (%) |
|-------------------|------------------------------|-------------|-------------------------|-----------------------------------|
|                   | Solid-liquid<br>interface    | Bulk liquid | Liquid-gas<br>interface |                                   |
| 0.57              | N.A                          | N. A.       | N.A                     | 71.1                              |
| 1.57              | 4.0                          | N. A.       | 29.3                    | 66.7                              |
| 2.41              | 5.4                          | 4.7         | 28.3                    | 61.6                              |
| 3.26              | 4.0                          | 9.5         | 28.2                    | 58.3                              |
| 4.09              | 4.1                          | 15.5        | 27.4                    | 53.0                              |

**Table S2** Percentage of the captured and uncaptured CO<sub>2</sub> in the C<sub>3</sub>N systems.

| Thickness<br>(nm) | Captured CO <sub>2</sub> (%) |             |                         | Uncaptured<br>CO <sub>2</sub> (%) |
|-------------------|------------------------------|-------------|-------------------------|-----------------------------------|
|                   | Solid-liquid<br>interface    | Bulk liquid | Liquid-gas<br>interface |                                   |
| 0.57              | N.A                          | N. A.       | N.A                     | 71.1                              |
| 1.43              | 4.5                          | N. A.       | 28.4                    | 67.1                              |
| 2.21              | 5.0                          | 4.0         | 27.9                    | 63.1                              |
| 3.00              | 4.4                          | 8.8         | 27.7                    | 59.1                              |
| 3.76              | 3.7                          | 13.1        | 28.4                    | 54.8                              |
